# Supplementary material
Source: HighWire-hosted journal article supplement (https://ejhp.bmj.com/highwire/filestream/150597/field_highwire_adjunct_files/0/ejhpharm-2021-002803supp001_data_supplement.pdf)

Supplemental figure 1 Preferred reporting items for systematic reviews and meta-analyses flow diagram of study selection process.

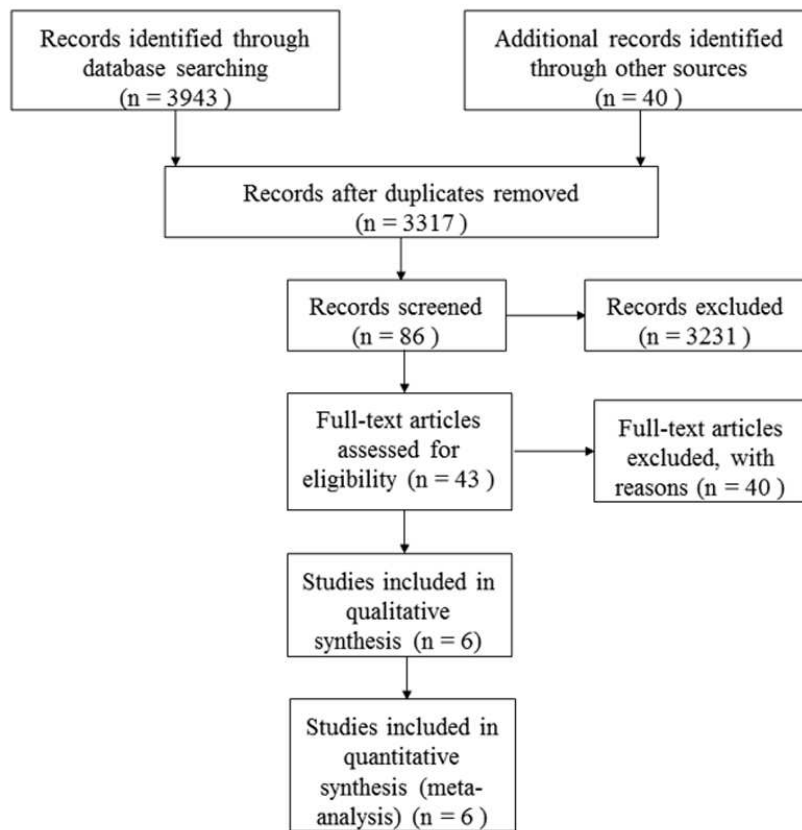

Supplement: ejhpharm-2021-002803supp001_data_supplement.pdf [file ejhpharm-2021-002803supp001_data_supplement.pdf]
